# Supplementary material
Source: ML conference proceedings conference paper supplement (https://www.ecva.net/papers/eccv_2020/papers_ECCV/html/123700477_ECCV_2020_paper.php)
Supplement: Supplementary file 1 [file 123700477-supp.zip]

# A Flexible Recurrent Residual Pyramid Network for Video Frame Interpolation

Anonymous ECCV submission

Paper ID 5095

In this supplementary document, we present additional results to complement the paper. Section A summarizes the details of our network. Section B provides more visual comparison results on various resolution cases. More video results are also provided on Supplementary Material.

## A Network Details

The configuration details of the Recurrent Residual Layer (RRL) are provided in Table 1. Batch normalization is adopted on RRL for accelerating convergence. The average pooling layers and bilinear upsampling layers are used to decrease and increase the spatial dimension by a factor of 2 for encoder and decoder, respectively. The  $\alpha$  of Leaky ReLU is set to be 0.1. In our refinement network, we use 3 residual blocks to predict the residual between the blended warped frames and the ground-truth frame. Table 2 provides the configuration details of the refinement network.

**Table 1.** Detailed configuration of the Recurrent Residual Layer.

|                   | Input                   | Output                  | Kernel size | #input channels | #output channels | Stride | Activation | Output size |
|-------------------|-------------------------|-------------------------|-------------|-----------------|------------------|--------|------------|-------------|
| feature extractor | RGB1 (RGB2)             | fea1_conv1 (fea2_conv1) | 3 × 3       | 3               | 16               | 1      | Leaky ReLU | H × W       |
|                   | fea1_conv1 (fea2_conv1) | fea1_conv2 (fea2_conv2) | 3 × 3       | 16              | 16               | 1      | Leaky ReLU | H × W       |
|                   | fea1_conv2 (fea2_conv2) | fea1_conv3 (fea2_conv3) | 3 × 3       | 16              | 16               | 1      | -          | H × W       |
| encoder           | features                | enc1_conv1              | 7 × 7       | 38              | 32               | 1      | Leaky ReLU | H × W       |
|                   | enc1_conv1              | enc1_conv2              | 7 × 7       | 32              | 32               | 1      | Leaky ReLU | H × W       |
|                   | enc1_conv2              | enc_pool1               | 2 × 2       | 32              | 32               | 2      | -          | H/2 × W/2   |
|                   | enc_pool1               | enc2_conv1              | 3 × 3       | 32              | 64               | 1      | Leaky ReLU | H/2 × W/2   |
|                   | enc2_conv1              | enc2_conv2              | 3 × 3       | 64              | 64               | 1      | Leaky ReLU | H/2 × W/2   |
|                   | enc2_conv2              | enc_pool2               | 2 × 2       | 64              | 64               | 2      | -          | H/4 × W/4   |
|                   | enc_pool2               | enc3_conv1              | 3 × 3       | 64              | 128              | 1      | Leaky ReLU | H/4 × W/4   |
|                   | enc3_conv1              | enc3_conv2              | 3 × 3       | 128             | 128              | 1      | Leaky ReLU | H/4 × W/4   |
|                   | enc3_conv2              | enc_pool3               | 2 × 2       | 128             | 128              | 2      | -          | H/8 × W/8   |
|                   | enc_pool3               | enc4_conv1              | 3 × 3       | 128             | 256              | 1      | Leaky ReLU | H/8 × W/8   |
|                   | enc4_conv1              | enc4_conv2              | 3 × 3       | 256             | 256              | 1      | Leaky ReLU | H/8 × W/8   |
|                   | enc4_conv2              | enc_pool4               | 2 × 2       | 256             | 256              | 2      | -          | H/16 × W/16 |
|                   | enc_pool4               | enc5_conv1              | 3 × 3       | 256             | 256              | 1      | Leaky ReLU | H/16 × W/16 |
|                   | enc5_conv1              | enc5_conv2              | 3 × 3       | 256             | 256              | 1      | Leaky ReLU | H/16 × W/16 |
| decoder           | enc5_conv2(up)          | dec1_conv1              | 3 × 3       | 256             | 256              | 1      | Leaky ReLU | H/8 × W/8   |
|                   | dec1_conv1+enc4_conv2   | dec1_conv2              | 3 × 3       | 256+256         | 256              | 1      | Leaky ReLU | H/8 × W/8   |
|                   | dec1_conv2(up)          | dec2_conv1              | 3 × 3       | 256             | 128              | 1      | Leaky ReLU | H/4 × W/4   |
|                   | dec2_conv1+enc3_conv2   | dec2_conv2              | 3 × 3       | 128+128         | 128              | 1      | Leaky ReLU | H/4 × W/4   |
|                   | dec2_conv2(up)          | dec3_conv1              | 3 × 3       | 128             | 64               | 1      | Leaky ReLU | H/2 × W/2   |
|                   | dec3_conv1+enc2_conv2   | dec3_conv2              | 3 × 3       | 64+64           | 64               | 1      | Leaky ReLU | H/2 × W/2   |
|                   | dec3_conv2(up)          | dec4_conv1              | 3 × 3       | 64              | 32               | 1      | Leaky ReLU | H × W       |
|                   | dec4_conv1+enc1_conv2   | dec4_conv2              | 3 × 3       | 32+32           | 32               | 1      | Leaky ReLU | H × W       |
| context network   | dec4_conv2              | out1                    | 3 × 3       | 32              | 6                | 1      | -          | H × W       |
|                   | dec4_conv2+out1         | dilat_conv1             | 3 × 3       | 38              | 32               | 1      | Leaky ReLU | H × W       |
|                   | dilat_conv1             | dilat_conv2             | 3 × 3       | 32              | 32               | 1      | Leaky ReLU | H × W       |
|                   | dilat_conv2             | dilat_conv3             | 3 × 3       | 32              | 32               | 1      | Leaky ReLU | H × W       |
|                   | dilat_conv3             | out2                    | 3 × 3       | 32              | 6                | 1      | -          | H × W       |

**Table 2.** Detailed configuration of the refinement network.

|           | Input                | Output     | Kernel size  | #input channels | #output channels | Stride | Activation | Output size  |
|-----------|----------------------|------------|--------------|-----------------|------------------|--------|------------|--------------|
| in        | features             | in_conv    | $5 \times 5$ | 142             | 64               | 1      | ReLU       | $H \times W$ |
| resblock1 | in_conv              | res1_conv1 | $7 \times 7$ | 64              | 64               | 1      | ReLU       | $H \times W$ |
|           | res1_conv1           | res1_conv2 | $7 \times 7$ | 64              | 64               | 1      | -          | $H \times W$ |
|           | in_conv+res1_conv2   | resblock1  | -            | 64              | 64               | 1      | ReLU       | $H \times W$ |
| resblock2 | resblock1            | res2_conv1 | $7 \times 7$ | 64              | 64               | 1      | ReLU       | $H \times W$ |
|           | res2_conv1           | res2_conv2 | $7 \times 7$ | 64              | 64               | 1      | -          | $H \times W$ |
|           | resblock1+res2_conv2 | resblock2  | -            | 64              | 64               | 1      | ReLU       | $H \times W$ |
| resblock3 | resblock2            | res3_conv1 | $7 \times 7$ | 64              | 64               | 1      | ReLU       | $H \times W$ |
|           | res3_conv1           | res3_conv2 | $7 \times 7$ | 64              | 64               | 1      | -          | $H \times W$ |
|           | resblock2+res3_conv2 | resblock3  | -            | 64              | 64               | 1      | ReLU       | $H \times W$ |
| out       | resblock3            | out_conv   | $7 \times 7$ | 64              | 3                | 1      | -          | $H \times W$ |

**B Visual Comparisons**

More visual comparison results on various resolution cases are provided in this section. Figure 1 and 2 shows more challenge cases on the H.266 test sequences (4K) and the ActivityNet (1080P videos). Figure 3 shows more visual comparisons on the Thumos15 (720P).

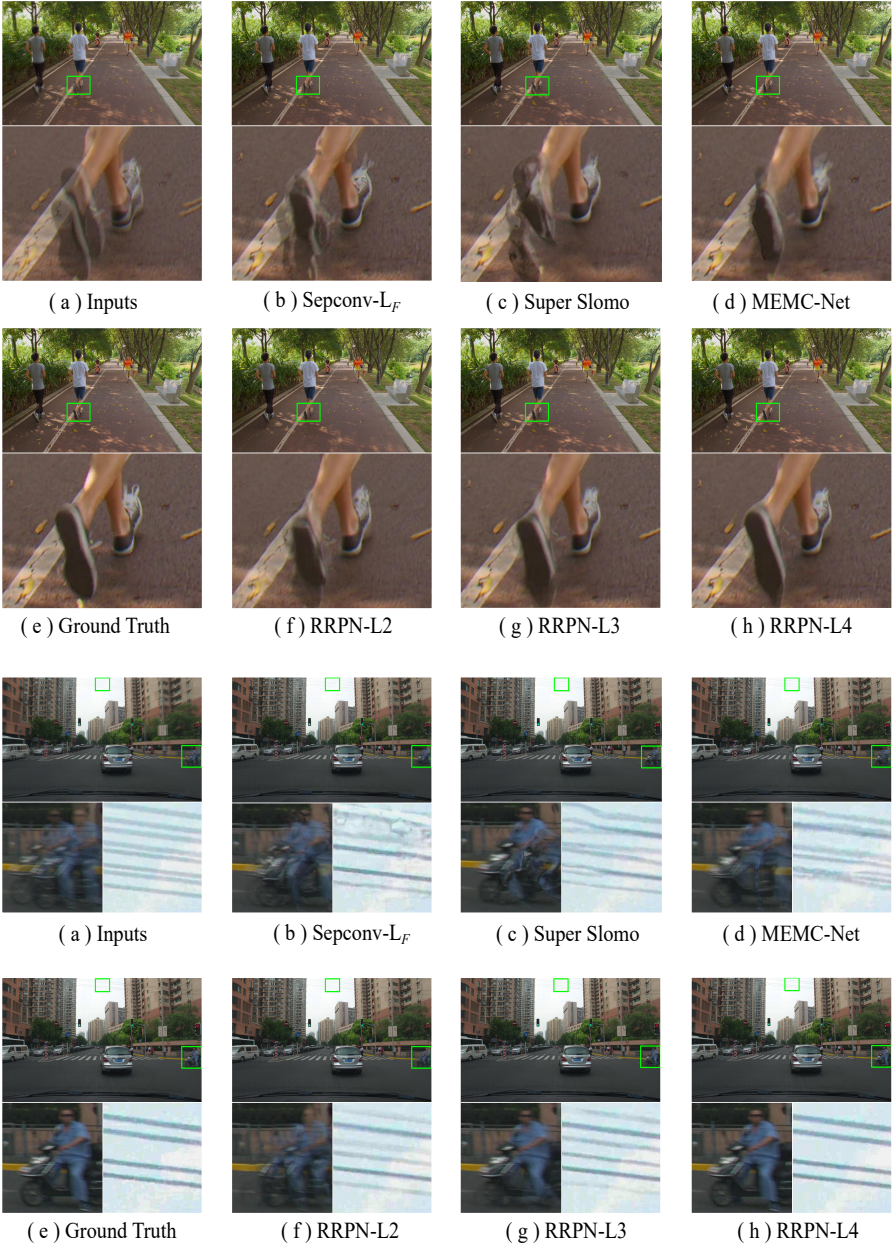

**Fig. 1.** More interpolation resolution from H.266 (4K) test data. Our approach can better capture large motions in different cases, even for small and thin objects. The contrast of image patches that contain wires are enhanced to better observe interpolation results of small and thin objects generated by different networks.

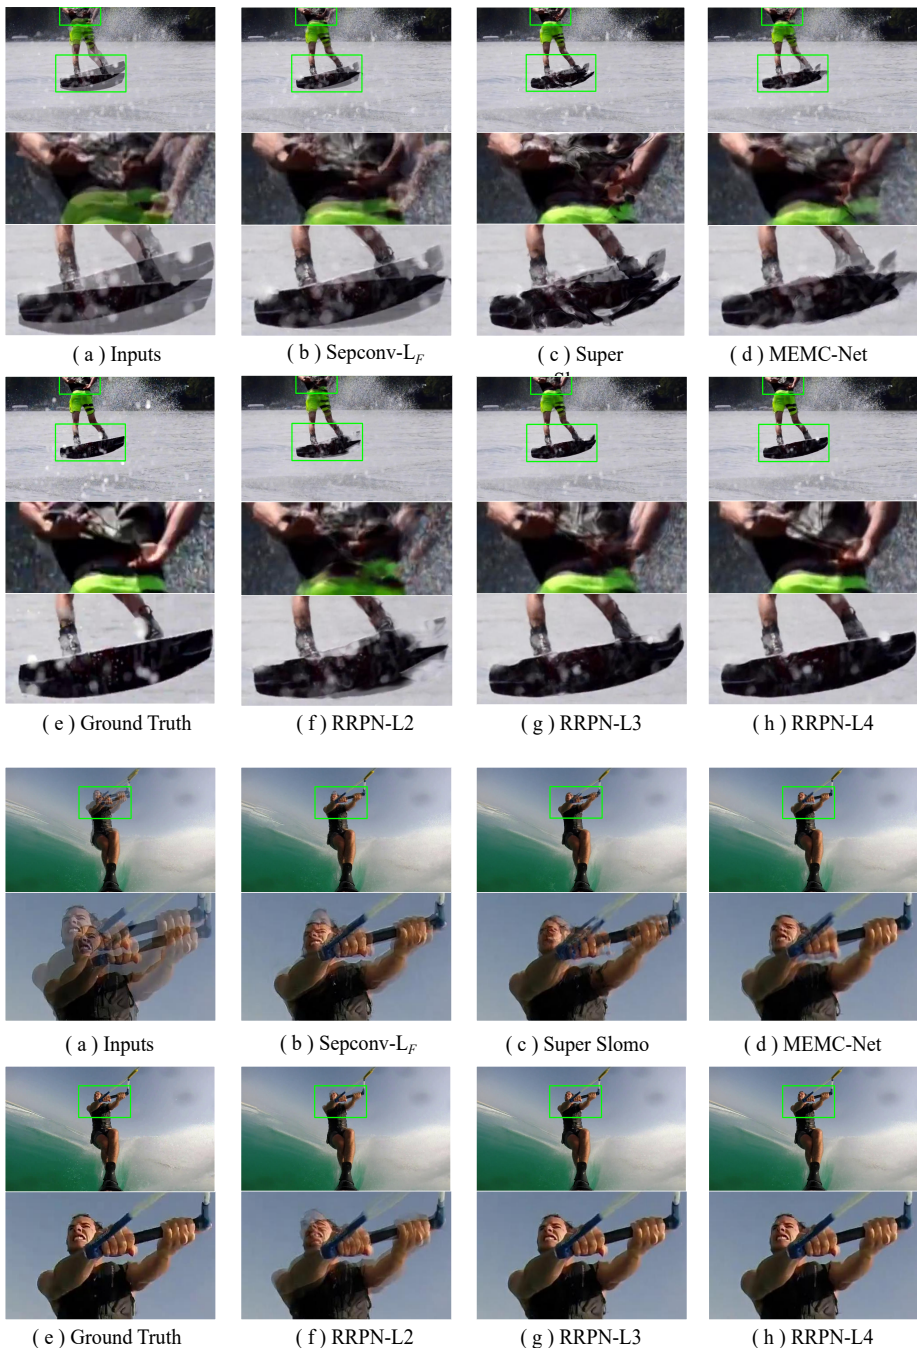

**Fig. 2.** More interpolation resolution from ActivityNet (1080P).



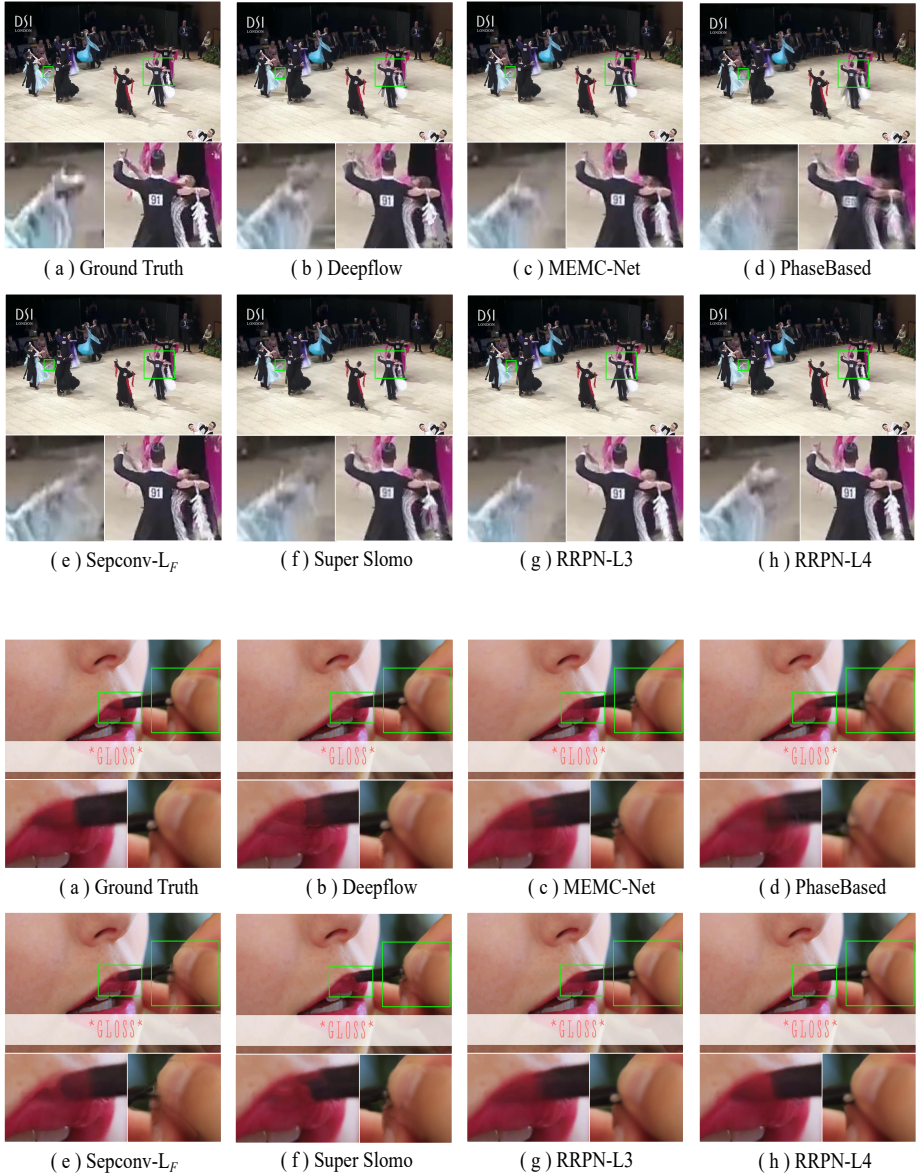

**Fig. 3.** More interpolation resolution from Thumos15 (720P).
